# Supplementary material
Source: PubMed Central journal article supplement (PMC5580905)
Supplement: 10.1194_R076315_jlr.R076315-1.pdf [file 10.1194_R076315_jlr.R076315-1.pdf]

## **SUPPLEMENTAL DATA**

### **Methods**

All protocols follow the UIC Institutional Animal Care and Use Committee protocols. Breeding and colony maintenance was conducted at the UIC as described (66).

#### *Immunohistochemical analysis*

General tissue processing and staining was conducted as described (71). Nine nonadjacent sections (108µm apart) were utilized for quantification per animal.

#### *Fibrinogen extravasation*

Fibrinogen (Rabbit anti-fibrinogen diluted 1:200 from Dako, AlexaFlour 647 anti-rabbit 1:200 from Invitrogen) was co-stained with CD31 (Rat anti-CD31 diluted 1:10 from B& D Bioscience with AlexaFlour 405 anti-rat diluted 1:200 from Invitrogen). 6 random images from each cortex per section were captured on a Zeiss Axio Imager M1 under identical capture settings at 20x magnification. For representative images, Z-stack images were taken at 20x magnification on a Zeiss LSM 710 Confocal Microscope and 3D reconstructions produced using Imaris 7.7.2 software. *Quantification.* Converted images were thresholded equally to diminish background signal (NIH ImageJ software) and quantified using the Analyze Particles function. Identified objects after thresholding were scanned to validate fibrinogen extravasation.

#### *CAA-like deposition*

A $\beta$  (MOAB-2, mouse IgG<sub>2b</sub>, 1:400 dilution, Biosensis Dako, Alexafluor 350 anti-mouse IgG<sub>2b</sub>) was co-stained with laminin (Rabbit, 1:400 dilution, Abcam). Mosaic images were captured on a

Zeiss Axio Imager M1 under identical capture settings at 20x magnification. *Quantification.* Converted images were thresholded equally and quantified using the colocalization threshold (NIH ImageJ software) function in . For more detailed analysis of CAA, a triple stain for laminin, CD31 and MOAB-2 was conducted, Z-stack images were taken at 20x magnification on a Zeiss LSM 710 Confocal Microscope and 3D reconstructions produced using Imaris 7.7.2 software.
